# VEGF pathway targeting agents, vessel normalization and tumor drug uptake: from bench to bedside

Marlous Arjaans<sup>1</sup>, Carolina P. Schröder<sup>1</sup>, Sjoukje F. Oosting<sup>1</sup>, Urania Dafni<sup>2</sup>, José E. Kleibeuker<sup>3</sup> and Elisabeth G.E. de Vries<sup>1</sup>

<sup>1</sup> Department of Medical Oncology, University of Groningen and University Medical Center Groningen, Groningen, The Netherlands

<sup>2</sup> Laboratory of Biostatistics, University of Athens, Athens, Greece

<sup>3</sup> Department of Materials Science and Metallurgy, University of Cambridge, Cambridge, UK

**Correspondence to:** Elisabeth G. E. de Vries, **email:** e.g.e.de.vries@umcg.nl

**Keywords:** antiangiogenic drugs, blood vessel normalization, tumor drug delivery

**Received:** July 27, 2015

**Accepted:** December 05, 2015

**Published:** January 14, 2016

## ABSTRACT

**Vascular endothelial growth factor (VEGF) pathway targeting agents have been combined with other anticancer drugs, leading to improved efficacy in carcinoma of the cervix, stomach, lung, colon and rectum, ovary, and breast. Vessel normalization induced by VEGF pathway targeting agents influences tumor drug uptake. Following bevacizumab treatment, preclinical and clinical studies have shown a decrease in tumor delivery of radiolabeled antibodies and two chemotherapeutic drugs. The decrease in vessel pore size during vessel normalization might explain the decrease in tumor drug uptake. Moreover, the addition of bevacizumab to cetuximab, or panitumumab in colorectal cancer patients or to trastuzumab in breast cancer patients, did not improve efficacy. However, combining bevacizumab with chemotherapy did increase efficacy in some cancer types. Novel biomarkers to select patients who may benefit from combination therapies, such as the effect of an angiogenesis inhibitor on tumor perfusion, requires innovative trial designs and large clinical trials. Small imaging studies with radiolabeled drugs could be used in the interphase to gain further insight into the interplay between VEGF targeted therapy, vessel normalization and tumor drug delivery.**

## INTRODUCTION

Angiogenesis is a hallmark of cancer that enables tumor growth [1]. Vascular endothelial growth factor A (VEGF-A) is a key player in the process of tumor angiogenesis, and the VEGF pathway has therefore been an important focus for anti-cancer drug development [2, 3]. Although angiogenesis is recognized to enable tumor growth, some tumors are capable of growing independent of angiogenesis by vessel co-option [4].

Antiangiogenic treatment blocks the formation of new blood vessels. The initially high hopes of VEGF pathway targeting agents as panacea for treatment of solid tumors have been replaced by a more realistic definition of their role. Single agent activity has been shown in renal cell carcinoma, hepatocellular carcinoma, pancreatic neuroendocrine tumors, soft tissue sarcomas

and in colorectal cancer. VEGF pathway targeting drugs have been added to other anticancer drugs to improve their efficacy. This approach has only been successful in carcinoma of the cervix, stomach, lung, colon, rectum, ovary, and breast [5-7]. Improved understanding of the underlying mechanisms could support rational drug combinations.

Preclinical and clinical studies have indicated that anti-VEGF therapy induces changes in function and architecture of existing blood vessels, described as vessel normalization [8]. Major characteristics of vessel normalization are reduced number and size of immature vessels, increased vessel pericyte coverage and reduced interstitial fluid pressure (IFP) [8, 9].

Another consideration is that changes in tumor vasculature caused by anti-VEGF therapy could also affect tumor uptake of other drugs. If preclinical data could be

used to predict the behavior of combination therapy, this would be of great benefit in the clinic. At present, however, translation of preclinical antiangiogenesis data to the clinic remains challenging. We reviewed the literature on the interplay between VEGF pathway targeting agents, vessel normalization and tumor drug delivery in the preclinical and clinical setting.

### Vessel normalization and VEGF-targeted agents

The vascular organization and structure of tumors differs from normal tissue [10]. Tumor vasculature is more tortuous and chaotic, with inadequate pericyte coverage, increased breaches between endothelial cells and alternating thick and thin basement membranes. This leads to increased vessel permeability and high IFP causing hypoxia [8, 9]. Preclinical studies have shown that anti-VEGF therapy can initiate vessel normalization. Vessel normalization is measured in the preclinical and clinical setting by decreased vessel diameter, blood volume, mean vessel density (MVD), macromolecular permeability, IFP and edema. Vessel normalization leads to an increase in partial oxygen pressure and perivascular cell coverage in the tumor [8, 9, 11-15]. In this review, we defined vessel normalization as pruning and remodeling of abnormal tumor vessels, leading to vessels resembling normal tissue vasculature in terms of structure and function [8, 9].

Translating preclinical insights about vessel normalization to the clinic has been challenging. This is due in part to the differences between tumor-bearing mice and human patients. Murine models with subcutaneous, fast-growing human tumors are generally used [16, 17]. In patients, primary tumor lesions can be located anywhere in the body and usually are slow-growing, with doubling times of months to years compared to weeks in murine models. Even with metastatic disease, clinical progression is generally much slower than in murine models. In addition, preclinical models often comprise a single, subcutaneous human tumor with murine vasculature. These tumors are often treated for weeks, at most. In patients, tumor and vasculature are of human origin, and long-term treatment is required for optimal antitumor effect. Furthermore, normal vasculature in patients will be aged, as for most cancers incidence rates increase with age [18]. To improve translation to the clinic, preclinical studies should ideally be representative for the stage of disease treated in the clinic, consist of tumor cells with a compatible immunocompetent microenvironment and examine combination therapies at appropriate dosages analogous to the clinic [19-21].

At the moment several VEGF pathway targeting agents are available. Registered drugs include small molecule tyrosine kinase inhibitors (TKI) targeting the VEGF receptors (VEGFR), and antibodies targeting VEGF and VEGFR2.

### VEGFR TKIs

A recent meta-analysis evaluated the efficacy and safety of combining VEGFR TKIs with chemotherapy in patients with solid tumors [22]. Data from 24 randomized controlled trials with a total of 8,961 patients was analyzed, with 879 patients participating in axitinib trials, 3,761 in sorafenib trials, 1,970 in sunitinib trials and 2,351 in vandetanib trials. The addition of VEGFR TKIs to chemotherapy increased side effects. There was an increase in any adverse events (relative risk 1.34, 95% confidence interval (CI) 1.20 - 1.50,  $P < .001$ ) and fatal adverse events (relative risk 1.49, 95% CI 1.16 - 1.90,  $P = .002$ ) [22].

Results from numerous phase 3 trials combining VEGFR TKIs with chemotherapy showed only marginal to no increased antitumor efficacy (Table 1). When combined with chemotherapy in metastatic colorectal cancer (mCRC), neither vatalanib (first- and second-line treatment) nor sunitinib (first-line treatment) increased progression-free survival (PFS) or overall survival (OS) [23-25]. In the randomized phase 3 HORIZON II trial, combination of cediranib with chemotherapy led to a clinically irrelevant increase of 0.3 months in PFS (HR 0.84,  $P = .012$ ), and had no effect on OS as first-line therapy in mCRC patients [26]. In addition, in metastatic breast cancer sunitinib had no effect on PFS or OS when combined with chemotherapy as first- and second-line therapy [27, 28]. In non-small cell lung cancer (NSCLC), addition of sorafenib to chemotherapy in the first-line had no effect on OS [29, 30]. Combining vandetanib with chemotherapy as second line NSCLC therapy in the randomized phase 3 ZODIAC trial led to an increase in PFS of 0.8 months (HR 0.79,  $P < .0001$ ) [31]. The randomized phase 3 ZEAL trial showed a positive trend in PFS, but no significant increase, when vandetanib was combined with chemotherapy in second-line treatment [32]. In the LUME-Lung 1 randomized phase 3 trial, the addition of nintedanib to chemotherapy in the second line increased PFS with 0.7 months (HR 0.79,  $P = .002$ ), but did not increase OS. A beneficial effect of 2.3 months (HR 0.83,  $P = .036$ ) on OS was only seen in the subgroup of patients with a histological defined adenocarcinoma [33].

Recently, the randomized phase 2 CIRCCa trial in metastatic and recurrent cervical cancer patients showed that the addition of cediranib to chemotherapy improved PFS with 1.4 months (HR 0.58,  $P = .032$ ) compared to placebo. However, the addition of cediranib did not increase OS in these patients [34].

In recurrent glioblastoma multiforme (GBM) patients, combining cediranib with chemotherapy in the randomized phase 3 REGAL trial did not increase PFS and had no effect on OS [35]. A small prospective study measured tumor blood perfusion changes with magnetic resonance imaging (MRI) during cediranib treatment in 30 recurrent GBM patients to evaluate the vascular

Table 1: Results from phase III trials combining antiangiogenic therapy with chemotherapy or monoclonal antibodies

| Phase III trials combining a VEGFR TKI with chemotherapy (CH)                                     |                                          |                                               |                                              |      |
|---------------------------------------------------------------------------------------------------|------------------------------------------|-----------------------------------------------|----------------------------------------------|------|
| Tumor type                                                                                        | VEGFR TKI                                | PFS (months)<br><i>TKI+CH vs CH+/-placebo</i> | OS (months)<br><i>TKI+CH vs CH+/-placebo</i> | Ref  |
| <b>Metastatic colorectal cancer</b>                                                               | vatalanib                                | 7.7 vs 7.6 (NS)                               | 21.4 vs 20.5 (NS)                            | 23   |
|                                                                                                   |                                          | 5.6 vs 4.2 ( <i>P</i> =.013)                  | 13.1 vs 11.9 (NS)                            | 24   |
|                                                                                                   | sumitinib                                | 7.8 vs 8.4 (NS)                               | 20.3 vs 19.8(NS)                             | 25   |
|                                                                                                   | cediranib                                | 8.6 vs 8.3 ( <i>P</i> =.012)                  | 19.7 vs 18.9 (NS)                            | 26   |
| <b>Metastatic breast cancer</b>                                                                   | sumitinib                                | 8.6 vs 8.3 (NS)                               | 24.8 vs 25.5 (NS)                            | 27   |
|                                                                                                   |                                          | 5.5 vs 5.9 (NS)                               | 16.4 vs 16.5 (NS)                            | 28   |
| <b>NSCLC</b>                                                                                      | sorafenib                                | 4.6 vs 5.4 (NS)                               | 10.7 vs 10.6 (NS)                            | 29   |
|                                                                                                   |                                          | 6.0 vs 5.5 ( <i>P</i> =.008)                  | 12.4 vs 12.5 (NS)                            | 30   |
|                                                                                                   | vandetanib                               | 4.0 vs 3.2 ( <i>P</i> <.0001)                 | 10.6 vs 10.0 (NS)                            | 31   |
|                                                                                                   |                                          | 17.6 vs 11.9 (weeks; NS)                      | 10.5 vs 9.2 (NS)                             | 32   |
|                                                                                                   | nintedanib                               | 3.4 vs 2.7 ( <i>P</i> =.0019)                 | 10.1 vs 9.1 (NS)                             | 33   |
| <b>Metastatic/recurrent cervical cancer</b>                                                       | cediranib (phase II)                     | 8.1 vs 6.7 ( <i>P</i> =.032)                  | 13.6 vs 14.8 (NS)                            | 34   |
| <b>Glioblastoma multiforme</b>                                                                    | cediranib                                | 125 vs 82 (days; NS)                          | 9.4 vs 9.8 (NS)                              | 35   |
| Phase III trials combining bevacizumab (B) with another monoclonal antibody and chemotherapy (CH) |                                          |                                               |                                              |      |
| Tumor type                                                                                        | Combination therapy                      | PFS (months)                                  | OS (months)                                  | Ref. |
| <b>Metastatic colorectal cancer</b>                                                               | cetuximab + B + CH vs B + CH             | 9.4 vs 10.4 ( <i>P</i> =.01)                  | 19.4 vs 20.3 (NS)                            | 46   |
|                                                                                                   | panitumumab + B + CH vs B + CH           | 10.4 vs 11.4 (HR1.3) ( <i>P</i> not reported) | 19.4 vs 24.5(HR1.4) ( <i>P</i> not reported) | 47   |
| <b>HER2 positive breast cancer</b>                                                                | trastuzumab + B + CH vs trastuzumab + CH | 16.5 vs 13.7 ( <i>P</i> =.07)                 | Not reported                                 | 48   |
|                                                                                                   |                                          | 12.2 vs 11.1 (NS)                             | Not reported                                 | 49   |
|                                                                                                   |                                          | Not reported                                  | 97% vs 96% (NS, 38 mo follow-up)             | 50   |
| Phase III trials combining ramucirumab (R) with chemotherapy (CH)                                 |                                          |                                               |                                              |      |
| Tumor type                                                                                        | Combination therapy                      | PFS (months)                                  | OS (months)                                  | Ref. |
| <b>Gastric and esophageal cancer</b>                                                              | R vs placebo                             | 2.1 vs 1.3 ( <i>P</i> <.0001)                 | 5.2 vs 3.8 ( <i>P</i> =.047)                 | 77   |
|                                                                                                   | R + CH vs placebo + CH                   | 4.4 vs 2.9( <i>P</i> <.0001)                  | 9.6 vs 7.4 ( <i>P</i> =.017)                 | 78   |
| <b>NSLC</b>                                                                                       | R + CH vs placebo + CH                   | 4.5 vs 3.0 ( <i>P</i> <.0001)                 | 10.5 vs 9.1 ( <i>P</i> =.023)                | 79   |
| <b>Metastatic colorectal cancer</b>                                                               | R + CH vs placebo + CH                   | 5.7 vs 4.5 ( <i>P</i> =.0005)                 | 13.3 vs 11.7 ( <i>P</i> =.02)                | 80   |
| <b>Metastatic breast cancer</b>                                                                   | R + CH vs placebo + CH                   | 9.5 vs 8.2 (NS)                               | 27.3 vs 27.2 (NS)                            | 81   |

Abbreviations: VEGFR TKI= vascular endothelial growth factor receptor tyrosine kinase inhibitor, B=bevacizumab, CH=chemotherapy, NSLC= non-small cell lung cancer, PFS= progression free survival, OS= overall survival, NS= no significant difference, mo=months, Ref=reference.

normalizing effects of cediranib [36]. Tumor perfusion increased in 7, decreased in 11 and remained stable in 12 patients. OS prolonged to 348 days in patients with increased perfusion, compared to 169 or 213 days in patients with respectively stable or decreased perfusion (*P* = .019). In another prospective study, patients with

newly diagnosed GBM received 30 mg/day cediranib with chemoradiation (*n* = 40) or chemoradiation alone (*n* = 14) [37]. Cediranib increased perfusion in 20 (50%) patients, decreased perfusion in 10 (25%) patients, and in 10 (25%) patients perfusion remained stable. These changes occurred at day 1 and became stable around day

8. However, in one out of the 14 (7%) control patients, perfusion increased with chemoradiation alone. In the combination group, increased perfusion was associated with a median OS of 26.3 months compared to 17.0 months for patients without increased perfusion ( $P = .028$ ). Based on MRI analyses, these two studies show that cediranib increased perfusion in a subgroup of GBM patients, which correlated with increased survival. These results suggested that increased tumor perfusion by cediranib induced vessel normalization might lead to increased tumor drug uptake and improved outcome in these patients [36, 37]. In addition to these studies, preclinical studies have shown that antiangiogenic therapy could potentiate radiotherapy by improving tumor oxygenation [38]. In randomized studies this did not translate to OS benefit. In newly diagnosed glioblastoma patients 2 randomized phase 3 trials, AVAglio and RTOG0825, studied the effect of the addition of bevacizumab to chemotherapy and radiotherapy. Both trials showed that the addition of bevacizumab did improve PFS (4.2 months in AVAglio (HR 0.64,  $P < .001$ ) and 3.4 months in RTOG0825 (HR 0.79,  $P = .007$ ), but had no effect on OS compared to placebo [39, 40].

Blood flow and perfusion are closely related terms. Strictly speaking blood flow is defined as blood volume

per time, whereas perfusion stands for blood volume per time per amount of tissue. This means that blood flow can be high, while perfusion e.g. as expressed per 100 g of tissue is low. Accurate measurement of tumor perfusion is of interest in determining effects of antiangiogenic therapy or evaluating drug delivery. Interesting imaging modalities to measure tumor perfusion in a noninvasive matter are PET and dynamic contrast-enhanced (DCE) CT or MRI. In DCE imaging a contrast agent is given and images made before, during and after injection are necessary to calculate contrast concentrations in the area of interest. In case of PET imaging, the tracer is injected and scans are made to directly measure tracer uptake. During DCE-MRI or CT imaging, contrast agents are used to measure perfusion. These contrast agents are not freely diffusible, thus uptake does not solely represent tumor perfusion. However they also provide insight in vasculature permeability.  $H_2^{15}O$ -PET is a freely diffusible tracer, thereby directly illustrating tumor perfusion. Furthermore, there is a linear relation between  $H_2^{15}O$  or contrast agent concentration and signal intensity as measured by PET or DCE-CT, which enables direct quantification. There is no linear relationship between contrast agent concentration and signal intensity as measured by DCE-MRI, complicating quantification of tumor perfusion [41 - 43].

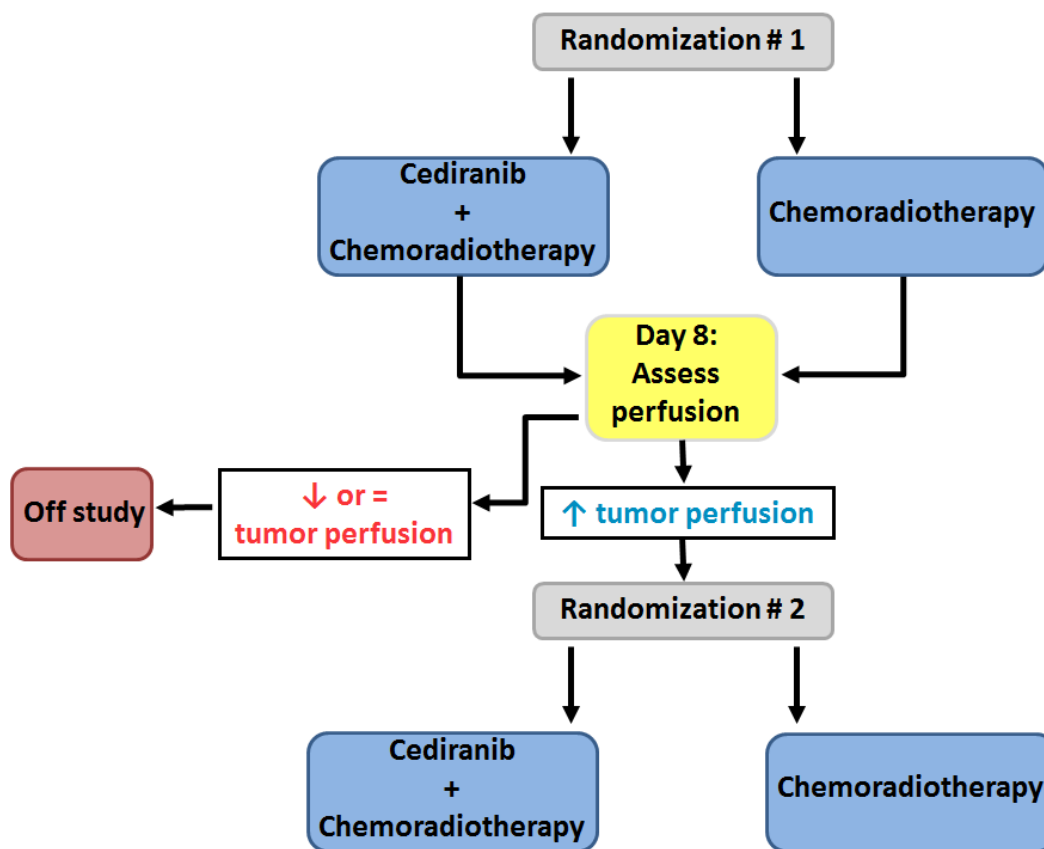

**Figure 1: Hypothetical trial to evaluate tumor perfusion as a predictive biomarker for survival in GBM patients.** To identify the biomarker-positive cohort, initially all patients are randomized to chemoradiotherapy with or without cediranib. In a second phase, only patients with increased perfusion after 8 days on treatment are randomized to continue chemoradiotherapy either with or without cediranib.



To provide insight into the implications of patient selection based on perfusion, we designed a hypothetical trial using an enrichment design for primary GBM patients treated with cediranib and/or standard chemoradiotherapy (Figure 1) [44, 45]. In such a design, the biomarker is evaluated in all randomized patients, but only patients who are defined as biomarker-positive, i.e. patients with increased tumor perfusion after 8 days on initial randomized treatment, are eligible for a second randomization [45]. To identify the biomarker-positive cohort, initially all patients are randomized to chemoradiotherapy with or without cediranib. In a second phase, only patients with increased perfusion after 8 days on treatment are randomized to continue chemoradiotherapy either with or without cediranib. The OS would be compared between randomized arms, to evaluate whether addition of cediranib provides benefit in patients who achieved increased perfusion, irrespective of the initial treatment that led to this increase. Patients with decreased or stable perfusion would be taken off study and complete standard chemoradiotherapy. The second study phase requires 310 patients, to achieve 80% power at a two-sided  $\alpha$  of 5%, assuming an OS improvement of 35% (HR = 0.65). This implies that 1,602 patients should have been enrolled upfront in the first randomization, with 460 and 1142 patients initially randomized to treatment with or without cediranib (respectively corresponding to 230 and 80 patients with increased perfusion at 8 days under initial treatment). This is a very large number of GBM patients; the landmark paper demonstrating the additive effect of chemotherapy to first line radiotherapy in GBM required 573 patients, accrued during 20 months in 85 centers in 20 countries [44].

## Bevacizumab

So far, combining another antibody with bevacizumab plus chemotherapy have shown detrimental to modestly beneficial effects (Table 1). For mCRC, combining bevacizumab, the anti-EGFR antibody cetuximab and chemotherapy in the phase 3 CAIRO2 trial did not improve OS compared to bevacizumab with chemotherapy alone. In fact, the addition of cetuximab decreased PFS by 1.2 months (HR 1.22,  $P = .01$ ) [46]. Furthermore, patients receiving cetuximab, bevacizumab and chemotherapy experienced more cetuximab-related side effects. Similar results were obtained in the phase 3 PACCE trial in mCRC patients receiving bevacizumab with chemotherapy or bevacizumab, chemotherapy and the anti-EGFR antibody panitumumab. In the panitumumab group, PFS decreased by 1.4 months (HR 1.27) and no effect was observed on OS [47].

In the phase 3 AVEREL trial in metastatic HER2 positive breast cancer patients, chemotherapy with anti-HER2 antibody trastuzumab or chemotherapy, trastuzumab and bevacizumab was administered [48].

Addition of bevacizumab marginally affected PFS (13.7 months without versus 16.5 months with bevacizumab; HR 0.82,  $P = .07$ ). Another randomized phase 3 trial in metastatic HER2 positive breast cancer patients also showed that addition of bevacizumab to trastuzumab and chemotherapy did not increase PFS (11.1 months without versus 12.2 months with bevacizumab; HR 0.65,  $P = .10$ ) [49]. Furthermore, in the randomized phase 3 BETH trial in early HER2 positive breast cancer patients the addition of bevacizumab to trastuzumab and chemotherapy had no effect on invasive disease free survival and OS at a median follow up of 38 months [50].

It has been suggested that vessel normalization could improve tumor drug uptake. In three small rectal cancer studies, comprising 5, 6 and 32 patients, vessel normalization induced by 5-10 mg/kg bevacizumab was investigated with biopsies, IFP measurements and functional computed tomography (CT) scans. At 12 days after bevacizumab administration, IFP decreased and the fraction of vessels covered with pericytes increased, while the permeability-surface area product remained stable. These findings indicate that bevacizumab induced vessel normalization in these patients [51-53]. However, this does not demonstrate a direct relationship between vessel normalization and improved tumor drug uptake. Imaging with radiolabeled drugs potentially provides a tool to quantify tumor drug uptake. Both preclinical and clinical studies have evaluated the effects of antiangiogenic therapy on tumor drug uptake. At the University Medical Center Groningen, we have developed  $^{89}\text{Zr}$ -labeled bevacizumab and  $^{89}\text{Zr}$ -trastuzumab as tracers for positron emission tomographic (PET) scanning to visualize and quantify bevacizumab and trastuzumab biodistribution for preclinical and clinical purposes [54-59]. These tracers can provide insight into how bevacizumab affects uptake of other antibodies. Despite limitations of animal models, these human grade tracers allow translation of preclinical findings to the clinic. In two xenograft models of human HER2-positive ovarian cancer (SKOV-3) and esophageal cancer (OE19) we used PET imaging to evaluate tumor uptake of radiolabeled trastuzumab (SKOV-3 and OE19), IgG (in SKOV-3) and bevacizumab (SKOV-3), before and after bevacizumab treatment [60]. On day 6, after three doses of 5 mg/kg bevacizumab, tumor uptake decreased by 41% and 39% for trastuzumab in SKOV-3 and OE19, respectively. For radiolabeled IgG and bevacizumab, tumor uptake decreased by 28% and 44% respectively after bevacizumab treatment. These results indicate that bevacizumab treatment affected antibody tumor uptake negatively. Bevacizumab therapy reduced microvessel density (MVD) in tumors and increased vessel pericyte coverage, indicating both anti-vascular and vessel normalizing effects of bevacizumab.

Two other preclinical studies reported similar results [61,62]. One 10 mg/kg dose of cross-reactive anti-VEGF antibody B20-4.1 decreased tumor trastuzumab

uptake by 50% after 2 days in a xenograft HER2-positive breast cancer model (KPL-4) [61]. Moreover, 10 mg/kg bevacizumab decreased tumor cetuximab uptake by 40% after 4 days in EGFR-positive breast cancer xenograft models (SUM149 and SKBR3) [62].

Importantly, these findings are supported in the clinical setting. A study in patients with renal cell carcinoma ( $n = 11$ ) showed a 47% decrease of  $^{89}\text{Zr}$ -bevacizumab tumor uptake 2 weeks after one therapeutic infusion of 10 mg/kg bevacizumab [63]. Thus, vessel normalization induced by bevacizumab seems to impair tumor delivery of antibodies.

In addition, two clinical imaging studies suggest bevacizumab also affects tumor drug delivery of chemotherapeutic drugs. In NSCLC patients ( $n = 10$ ), a single dose of 15 mg/kg bevacizumab reduced  $^{11}\text{C}$  labeled-docetaxel tumor delivery by 22% after 5 hours and by 34% after 4 days [64]. Moreover, tumor drug delivery of  $^{18}\text{F}$ -5-fluorouracil decreased by 20% at 24 hours after a single administration of 7.5 mg/kg bevacizumab in mCRC patients ( $n = 5$ ) [65]. Phase 3 trials combining bevacizumab with chemotherapy show varying results. Bevacizumab combined with chemotherapy in colorectal, ovarian, cervical and HER2-negative breast cancer has shown an increase in PFS [66 - 70].

A small imaging study evaluated the effect of bevacizumab on tumor perfusion and survival in 36 NSCLC patients [71]. Patients received a dose of 15mg/kg bevacizumab as induction therapy, which after 14 days was followed by the combination of carboplatin, nab-paclitaxel and bevacizumab for a maximum of 6 cycles of 21 days. Blood flow, blood volume and permeability surface, measured by CT, all decreased after induction and during combination therapy. In addition, mean transit time (MTT), a measurement for perfusion, showed a slight increase during combination therapy. This reflects a decrease in perfusion and was suggested to be associated with shorter survival in these patients ( $P = .05$ ). Together with the cediranib imaging studies in GBM patients, these results suggest that perfusion could be a potential read-out for vessel normalization and a possible predictive biomarker for survival [36, 37, 71].

## VEGFR2 antibodies

Intravital imaging showed that DC101, an antibody against mouse VEGFR2, induced vessel normalization in an orthotopic mammary tumor model [72]. This particular study is a key paper as it provided insight into the effect of vessel normalization on pore size of tumor vasculature. The nanoparticles used were quantum dots coated with polymeric imidazole ligand (PIL) ( $\varnothing = 12$  nm) or polyethylene glycol (PEG) ( $\varnothing = 60$  and 120 nm) [73]. Pore size was determined by modeling nanoparticle penetration rate, given as transvascular flux per unit vascular surface area. Vessel normalization by DC101 coincided with a

decrease in pore size of tumor vasculature, resulting in an increase of the penetration rate of small nanoparticles (12 nm) but no difference in penetration rate for 60 and 120 nm size nanoparticles. This means that the effect of DC101 on pore size was mainly based on the difference in the transvascular flux of 12 nm particles in tumors with and without DC101 treatment. Moreover, in the E0771 xenograft model treated with DC101, for example, a large spread in transvascular flux of 12 nm nanoparticles was already present in this group (from 0.05 - 0.3  $\mu\text{m s}^{-1}$ ). Such a substantial variation leads to a large uncertainty in model outcomes on pore size, which was not discussed by the authors. Since antibodies are approximately 12 nm in size, similar to the small nanoparticles, it was suggested that DC101-induced vessel normalization may also improve tumor drug delivery of antibodies [74]. However, although their size is similar, there are substantial chemical differences between nanoparticles used in this study and antibodies, which may affect penetration rate [72, 73]. Firstly, nanoparticles are spherically shaped, whereas antibodies are Y-shaped [75, 76]. Secondly, the mass (density) of the nanoparticles and antibodies may be different. Thirdly, the chemistry of the outer shell of the nanoparticles used in this study is different than the chemistry of antibodies [72]. The PIL-coated 12 nm size nanoparticles have mainly methoxy (R-O-CH<sub>3</sub>) functional end groups in the outer shell, and the PEG-coated 60 and 125 nm particles have hydroxyl (R-OH) functional end groups. On the other hand, antibodies, which can be seen as a combination of four biopolymers, mainly have R-NH<sub>2</sub> and R-COOH end groups [75, 76]. These differences can make it difficult to translate results from these specific nanoparticles to “nanomedicines” such as antibodies.

This important study also investigated whether DC101-induced vessel normalization could improve efficacy of small chemotherapeutics [72]. Mice were treated with DC101, placebo, DC101 or placebo plus abraxane (albumin-bound paclitaxel,  $\varnothing = 10$  nm) and DC101 or placebo plus doxil (liposome-encapsulated doxorubicin,  $\varnothing = 100$  nm). Tumor doubling times were used as read-out for efficacy. Both DC101 alone and DC101 plus doxil had no effect on tumor doubling times compared to placebo or doxil plus placebo. However, DC101 plus abraxane did increase tumor doubling times compared to placebo plus abraxane. From these data it was concluded that the vessel-normalizing effects of DC101 increased tumor penetration of abraxane. The results of control experiments in this article showed a large range in tumor doubling times in the placebo plus doxil group, which might have influenced the results for this group.

In the clinic, VEGFR2 antibody ramucirumab, which is administered at much lower doses than in the mouse model, has shown very modest or no effect in 5 phase 3 clinical trials (Table 1). Ramucirumab monotherapy (8 mg/kg every 2 weeks) increased PFS by 0.8 months (HR: 0.48,  $P < .0001$ ) and prolonged OS by 1.4 months (HR:

0.77,  $P = .047$ ) in gastric cancer and esophageal junction adenocarcinoma patients in the second line [77]. Adding ramucirumab (8 mg/kg every 2 weeks) to paclitaxel increased PFS from 2.9 months to 4.4 months (HR 0.63,  $P < .0001$ ) and prolonged OS by 2.3 months from 7.4 to 9.6 months (HR 0.80,  $P = .017$ ) in advanced gastric and esophageal junction adenocarcinoma patients [78]. In addition, in NSCLC patients, 10 mg/kg ramucirumab every 3 weeks combined with docetaxel increased PFS by 1.5 months (HR 0.76,  $P < .0001$ ) and prolonged OS by 1.4 months (HR 0.86,  $P = .023$ ) as second-line therapy [79]. In mCRC, FOLFIRI combined with 8 mg/kg ramucirumab prolonged OS compared to FOLFIRI with placebo with 1.6 months from 11.7 to 13.3 months (HR 0.85,  $P = .02$ ) in the second line [80]. However, in breast cancer patients, 10 mg/kg ramucirumab every 3 weeks combined with docetaxel did not affect PFS or OS [81]. The FDA recently approved ramucirumab for advanced gastric and esophageal junction adenocarcinoma, metastatic NSCLC and mCRC patients.

## DISCUSSION

To date, preclinical studies have shown that antiangiogenic therapy can induce vessel normalization. Clinical studies have illustrated that this is not just a preclinical phenomenon; it also occurs in patients. Although some studies have suggested that vessel normalization can improve drug delivery of chemotherapy and enhance efficacy of combination therapies, there is no direct evidence for better tumor drug uptake. On the contrary, both preclinical and clinical studies with radioactive labeled drugs have shown decreased tumor delivery of antibodies as well as chemotherapeutic agents. In the case of chemotherapy, this did not inevitably result in the absence of an additional effect of combination therapy, although it may explain the disappointing results and lack of synergism. In addition to vessel normalization, other mechanisms have been proposed to explain how antiangiogenic agents can improve efficacy of chemotherapy. Certain chemotherapeutic agents can have a local antiangiogenic effect by affecting endothelial cells. This can result in an increased mobilization of circulating endothelial progenitor cells, again promoting tumor angiogenesis. The addition of an antiangiogenic agent can thus counteract this response, thereby improving efficacy of chemotherapy. Furthermore, in response to chemotherapy VEGF and VEGF-receptor expression by tumor cells can increase. The addition of an antiangiogenic agent can subsequently enhance the anti-proliferative action of chemotherapy. Another mechanism proposed is that antiangiogenic agents can inhibit tumor cell repopulation in between chemotherapy cycles, thereby increasing efficacy [82-86].

In the case of antibodies, results from clinical trials in colorectal and breast cancer patients are in line with

reduced antibody uptake after antiangiogenic therapy. A possible explanation for decreased uptake could be the change in vessel pore size during vessel normalization. This might influence tumor drug uptake, depending on the size, shape and chemical structure of the drug. New data from a different angle are in line with this interpretation. Wong *et al.* performed a study in NSCLC and pancreatic ductal adenocarcinoma tumor models with low-dose cilengitide, an antiangiogenic agent selectively inhibiting  $\alpha_v$  integrins, and verapamil [87]. The combination therapy led to an increase in blood flow and perfusion, MVD and vascular permeability in these tumors.

Moreover, addition of gemcitabine (75 mg/kg) or cisplatin (6 mg/kg) to the combination therapy reduced tumor growth and progression compared to placebo, gemcitabine or cisplatin treatment alone. High-performance liquid chromatography-mass spectrometry showed that cilengitide combined with verapamil increased intratumoral drug delivery of gemcitabine. Overall these findings indicate that tumor angiogenesis or even vascular promotion therapy could improve drug delivery.

Most research concerning vessel normalization has been performed on primary tumors. Preclinical and clinical studies have shown that vessel normalization is a delicate process, occurring during a certain timeframe and dependent on the dose of the antiangiogenic drug [9]. However, it remains unclear how vessel normalization will occur in the metastasized setting. In normal healthy tissue, tissue-specific vessel functions illustrate vessel heterogeneity for different organs [88]. This also applies to the tumor vasculature, and indeed, different types of tumor blood vessels have been identified [89, 90]. In NSCLC patients, for instance, the primary tumor and matched brain metastases differed in MVD, vessel maturity and VEGF expression [91].

Finally, regarding vessel normalization there is a need for a biomarker to evaluate this process in different tumor types and stages. Tumor perfusion is a potential biomarker to select patients who may benefit from combinations of antiangiogenic and other drugs. However, assessing the role of tumor perfusion requires innovative study designs and extensive clinical trials. A possible tool to eventually improve drug delivery to individual tumors, and thereby optimize outcomes of combination therapies, could be *in vivo* imaging of labeled drugs. This might clarify the interplay between vessel normalization and tumor drug delivery. Small clinical trials could be performed to visualize the effects of antiangiogenic drugs on the distribution of other labeled drugs, to provide serial information on whole body drug distribution, and to guide rational trial design for large combinatorial studies.

## ACKNOWLEDGMENTS

None.



## CONFLICTS OF INTEREST

Funding/Support: de Vries received grant support by the advanced ERC grant OnQview. Research grants from Hoffmann La Roche, Genentech, Novartis and Amgen were awarded to the UMCG. Schröder received grant RUG 2010-4739 from the Dutch Cancer Society.

Role of the Funder/Sponsor: The funders had no role in the design and conduct of the study; collection, management, analysis, and interpretation of the data; preparation, review, or approval of the manuscript; and decision to submit the manuscript for publication.

## Authors' contributions

MA, CPS, SFO, UD and EGEDV were involved in study conception and design. Analysis and interpretation of data and writing the manuscript was performed by all authors. The study was supervised by EGEDV. The final manuscript was approved by all authors.

## REFERENCES

1. Hanahan D, Weinberg RA. Hallmarks of cancer: the next generation. *Cell*. 2011; 144: 646-674.
2. Ferrara N, Gerber HP, LeCouter J. The biology of VEGF and its receptors. *Nat Med*. 2003; 9: 669-676.
3. Kerbel RS. Tumor angiogenesis. *N Engl J Med*. 2008; 358: 2039-2049.
4. Donnem T, Hu J, Ferguson M, Adighibe O, Snell C, Harris AL, Gatter KC, Pezzella F. Vessel co-option in primary human tumors and metastases: an obstacle to effective anti-angiogenic treatment? *Cancer Med*. 2013; 2: 427-436.
5. Bottsford-Miller JN, Coleman RL, Sood AK. Resistance and escape from antiangiogenesis therapy: clinical implications and future strategies. *J Clin Oncol*. 2012; 30: 4026-4034.
6. Jayson GC, Hicklin DJ, Ellis LM. Antiangiogenic therapy-evolving view based on clinical trial results. *Nat Rev Clin Oncol*. 2012; 9: 297-303.
7. Blagosklonny MV. Antiangiogenic therapy and tumor progression. *Cancer Cell*. 2004; 5: 13-17.
8. Carmeliet P, Jain RK. Principles and mechanisms of vessel normalization for cancer and other angiogenic diseases. *Nat Rev Drug Discov*. 2011; 10: 417-427.
9. Jain RK. Normalizing tumor microenvironment to treat cancer: bench to bedside to biomarkers. *J Clin Oncol*. 2013; 31: 2205-2218.
10. Nagy JA, Chang SH, Dvorak AM, Dvorak HF. Why are tumour blood vessels abnormal and why is it important to know? *Br J Cancer*. 2009; 100: 865-869.
11. Goel S, Duda DG, Xu L, Munn LL, Boucher Y, Fukumura D, Jain RK. Normalization of the vasculature for treatment of cancer and other diseases. *Physiol Rev* 2011; 91: 1071-121.
12. Ozerdem U, Stallcup WB. Early contribution of pericytes to angiogenic sprouting and tube formation. *Angiogenesis* 2003; 6: 241-49.
13. Yuan F, Chen Y, Dellian M, Safabakhsh N, Ferrara N, Jain RK. Time-dependent vascular regression and permeability changes in established human tumor xenografts induced by an anti-vascular endothelial growth factor/vascular permeability factor antibody. *Proc Natl Acad Sci USA* 1996; 93: 14765-70.
14. Tong RT, Boucher Y, Kozin SV, Winkler F, Hicklin DJ, Jain RK. Vascular normalization by vascular endothelial growth factor receptor 2 blockade induces a pressure gradient across the vasculature and improves drug penetration in tumors. *Cancer Res* 2004; 64: 3731-6.
15. Winkler F, Kozin SV, Tong RT, Chae SS, Booth MF, Garkavtsev I, Xu L, Hicklin DJ, Fukumura D, di Tomaso E, Munn LL, Jain RK. Kinetics of vascular normalization by VEGFR2 blockade governs brain tumor response to radiation: role of oxygenation, angiopoietin-1, and matrix metalloproteinases. *Cancer Cell*. 2004; 6: 553-63.
16. Richmond A, Su Y. Mouse xenograft models vs GEM models for human cancer therapeutics. *Dis Model Mech*. 2008; 1: 78-82.
17. Sausville EA, Burger AM. Contributions of human tumor xenografts to anticancer drug development. *Cancer Res* 2006; 66: 3351-3354.
18. Coleman WB, Tsongalis GJ. *Molecular pathology: the molecular basis of human disease*. Amsterdam: Elsevier Academic Press: 2009.
19. Singh M, Ferrara N. Modeling and predicting clinical efficacy for drugs targeting the tumor milieu. *Nat Biotechnol*. 2012; 30: 648-657.
20. Politi K, Pao W. How genetically engineered mouse tumor models provide insights into human cancers. *J Clin Oncol*. 2011; 29: 2273-2281.
21. Hidalgo M, Amant F, Biankin AV, Budinská E, Byrne AT, Caldas C, Clarke RB, de Jong S, Jonkers J, Mari Mælandsmo G, Roman-Roman S, Seoane J, Truslino L et al. Patient-derived xenograft models: an emerging platform for translational cancer research. *Cancer Discov*. 2014; 4: 998-1013.
22. Funakoshi T, Latif A, Galsky MD. Safety and efficacy of addition of VEGFR and EGFR-family oral small-molecule tyrosine kinase inhibitors to cytotoxic chemotherapy in solid cancers: a systematic review and meta-analysis of randomized controlled trials. *Cancer Treatm Rev*. 2014; 40: 636-647.
23. Hecht JE, Trarbach T, Hainsworth JD, Major P, Jäger E, Wolff RA, Lloyd-Salvant K, Bodoky G, Berg W, Chen BL, Jalava T, Meinhardt G, et al. Randomized, placebo-controlled, phase III study of first-line oxaliplatin-based chemotherapy plus PTK787/ZK 2222584, an oral vascular endothelial growth factor receptor inhibitor, in patients



- with metastatic colorectal adenocarcinoma. *J Clin Oncol.* 2011;29:1997-2003.
24. Van Cutsem E, Bajetta E, Valle J, Köhne CH, Hecht JR, Moore M, Germond C, Berg J, Chen BL, Jalava T, Lebowitz D, Meinhardt G, Laurent D, et al. Randomized, placebo-controlled, phase III study of oxaliplatin, fluorouracil, and leucovorin with or without PTK787/ZK 2222584 in patients with previously treated metastatic colorectal adenocarcinoma. *J Clin Oncol.* 2011; 29: 2004-2010.
  25. Carrato A, Swieboda-Sadlej A, Staszewska-Skurczynska M, Lim R, Roman L, Shparyk Y, Bondarenko I, Jonker DJ, Sun Y, De la Cruz JA, Williams JA, Korytowsky B, Christensen JG, et al. Fluorouracil, leucovorin, and irinotecan plus either sunitinib or placebo in metastatic colorectal cancer: a randomized, phase III trial. *J Clin Oncol.* 2013; 31: 1341-1347.
  26. Hoff PM, Hochhaus A, Pestalozzi BC, Tebutt NC, Li J, Kim TW, Koynov KD, Kurteva G, Pintér T, Cheng Y, van Eyll B, Pike L, Fielding A, et al. Cediranib plus FOLFOX/CAPOX versus placebo plus FOLFOX/CAPOX in patients with previously untreated metastatic colorectal cancer: a randomized, double-blind, phase III study (HORIZON II). *J Clin Oncol.* 2012; 30: 3596-35603.
  27. Bergh J, Bondarenko IM, Lichinitser MR, Liljegren A, Greil R, Voytko NL, Makhson AN, Cortes J, Lortholary A, Bischoff J, Chan A, Delaloge S, Huang X, et al. First-line treatment of advanced breast cancer with sunitinib in combination with docetaxel versus docetaxel alone: results of a prospective, randomized phase III study. *J Clin Oncol.* 2012; 30: 921-929.
  28. Crown JP, Diéras V, Staroslawska E, Yardley DA, Bachelot T, Davidson N, Wildiers H, Fasching PA, Capitain O, Ramos M, Greil R, Cognetti F, Fountzilias G, et al. Phase III trial of sunitinib in combination with capecitabine versus capecitabine monotherapy for the treatment of patients with pretreated metastatic breast cancer. *J Clin Oncol.* 2013; 31: 2870-2878.
  29. Scagliotti G, Novello S, von Pawel J, Reck M, Pereira JR, Thomas M, Abrão Miziara JE, Balint B, De Marinis F, Keller A, Arén O, Csollak M, Albert I, et al. Phase III study of carboplatin and paclitaxel alone or with sorafenib in advanced non-small-cell lung cancer. *J Clin Oncol.* 2010; 28: 1835-1842.
  30. Paz-Ares LG, Biesma B, Heigener D, von Pawel J, Eisen T, Bennouna J, Zhang L, Liao M, Sun Y, Gans S, Syrigos K, Le Marie E, Gottfried M, et al. Phase III, randomized, double-blind, placebo-controlled trial of gemcitabine/cisplatin alone or with sorafenib for the first-line treatment of advanced, nonsquamous non-small-cell lung cancer. *J Clin Oncol.* 2012; 30: 3084-3092.
  31. Herbst RS, Sun Y, Eberhardt WE, Germonpré P, Saijo N, Zhou C, Wang J, Li L, Kabbinnar F, Ichinose Y, Qin S, Zhang L, Biesma B, et al. Vandetanib plus docetaxel versus docetaxel as second-line treatment for patients with advanced non-small-cell lung cancer (ZODIAC): A double-blind, randomised, phase 3 trial. *Lancet Oncol.* 2010; 11: 619-626.
  32. de Boer RH, Arrieta Ó, Yang CH, Gottfried M, Chan V, Raats J, de Marinis F, Abratt RP, Wolf J, Blackhall FH, Langmuir P, Milenkova T, Read J, et al. Vandetanib plus pemetrexed for the second-line treatment of advanced non-small-cell lung cancer: a randomized, double-blind phase III trial. *J Clin Oncol.* 2011; 29: 1067-1074.
  33. Reck M, Kaiser R, Mellemegaard A, Douillard JY, Orlos S, Krzakowski M, von Pawel J, Gottfried M, Bondarenko I, Liao M, Gann CN, Barrueco J, Gaschler-Markefski B, et al. Docetaxel plus nintedanib versus docetaxel plus placebo in patients with previously treated non-small-cell lung cancer (LUME-Lung 1): a phase 3 double-blind, randomized controlled trial. *Lancet Oncol.* 2014; 15: 143-155.
  34. Symonds RP, Gourley C, Davidson S, Carty K, McCartney E, Rai D, Banerjee S, Jackson D, Lord R, McCormack M, Hudson E, Reed N, Flubacher M, et al. Cediranib combined with carboplatin and paclitaxel in patients with metastatic or recurrent cervical cancer (CIRCCa): a randomized, double-blind, placebo-controlled phase 2 trial. *Lancet Oncol.* 2015; 16: 1515-1524.
  35. Batchelor TT, Mulholland P, Neyns B, Nabors LB, Campone M, Wick A, Mason W, Mikkelsen T, Phuphanich S, Ashby LS, Degroot J, Gattamaneni R, Cher L, et al. Phase III randomized trial comparing the efficacy of cediranib as monotherapy, and in combination with lomustine, versus lomustine alone in patients with recurrent glioblastoma. *J Clin Oncol.* 2013; 31: 3212-3218.
  36. Sorensen AG, Emblem KE, Polaskova P, Jennings D, Kim H, Ancukiewicz M, Wang M, Wen PY, Ivy P, Batchelor TT, Jain RK. Increased survival of glioblastoma patients who respond to antiangiogenic therapy with elevated blood perfusion. *Cancer Res.* 2012; 72: 402-407.
  37. Batchelor TT, Gerstner ER, Emblem KE, Duda DG, Kalpathy-Cramer J, Snuderl M, Ancukiewicz M, Polaskova P, Pinho MC, Hennings D, Plotkin SR, Chi AS, Eichler AF, et al. Improved tumor oxygenation and survival in glioblastoma patients who show increased blood perfusion after cediranib and chemoradiation. *Proc Natl Acad Sci USA.* 2013; 110: 19059-19064.
  38. Kleibeuker EA, Griffioen AW, Verheul HM, Slotman BJ, Thijssen VL. Combining angiogenesis inhibition and radiotherapy: A double-edged sword. *Drug Resist Updat.* 2012; 15: 173-182.
  39. Chinot OL, Wick W, Mason W, Henriksson R, Saran F, Nishikawa R, Carpentier AF, Hoang-Xuan K, Kavan P, Cemea D, Brandes AA, Hilton M, Abrey L et al. Bevacizumab plus radiotherapy-temozolomide for newly diagnosed glioblastoma. *N Engl J Med.* 2014; 370: 709-722.
  40. Gilbert MR, Dignam JJ, Armstrong TS, Wefel JS, Blumenthal DT, Vogelbaum MA, Colman H, Chakravarti A, Pugh S, Won M, Jeraj R, Brown PD, Jaeckle KA et al. A randomized trial of bevacizumab for newly diagnosed glioblastoma. *N Engl J Med.* 2014; 370: 699-708.

41. de Langen AJ, van den Boogaart VEM, Marcus JT, Lubberink M. Use of H215O-PET and DCE-MRI to measure tumor blood flow. *The Oncologist*. 2008; 13: 631-644.
42. Ingrisich M, Sourbron S. Tracer-kinetic modeling of dynamic contrast-enhanced MRI and CT: a primer. *J Pharmacokinet Pharmacodyn*. 2013; 40: 281-300.
43. Van der Veldt AAM, Hendrikse NH, Harms HJ, Comans EFI, Postmus PE, Smit EF, Lammertsma AA, Lubberink M. Quantitative parametric perfusion images using 15O-labeled water and a clinical PET/CT scanner: Test-retest variability in lung cancer. *J Nucl Med*. 2010; 51: 1684-1690.
44. Stupp R, Mason WP, van den Bent MJ, Weller M, Fisher B, Taphoorn MJ, Belanger K, Brandes AA, Marosi C, Bogdahn U, Curschmann J, Janzer RC, Ludwin SK, et al. Radiotherapy plus concomitant and adjuvant temozolomide for glioblastoma. *N Engl J Med*. 2005; 352: 987-996.
45. Freidlin B, McShane LM, Korn EL. Randomized clinical trials with biomarkers: design issues. *J Natl Cancer Inst*. 2010; 102: 152-160.
46. Tol J, Koopman M, Cats A, Rodenburg CJ, Creemers GJ, Schrama JG, Erdkamp FL, Vos AH, van Groenigen CJ, Sinnige HA, Richel DJ, Voest EE, Dijkstra JR, et al. Chemotherapy, bevacizumab and cetuximab in metastatic colorectal cancer. *N Engl J Med*. 2009; 360: 563-572.
47. Hecht JR, Mitchell E, Chidiac T, Scroggin C, Hagenstad C, Spigel D, Marshall J, Cohn A, McCollum D, Stella P, Deeter R, Shahin S, Amado RG. A randomized phase IIIB trial of chemotherapy and bevacizumab and panitumumab compared with chemotherapy and bevacizumab alone for metastatic colorectal cancer. *J Clin Oncol*. 2009; 27: 672-680.
48. Gianni L, Romieu GH, Lichinitser M, Serrano SV, Mansutti M, Pivot X, Mariani P, Ander F, Chan A, Lipatov O, Chan S, Wardley A, Greil R, et al. AVEREL: A randomized phase III trial evaluating bevacizumab in combination with docetaxel and trastuzumab as first-line therapy for HER2-positive locally recurrent/metastatic breast cancer. *J Clin Oncol*. 2013; 31: 1719-1725.
49. Arteaga CL, Mayer IA, O'Neill AM, Swaby RF, Alpaugh K, Yang XJ, Wagner LI, Meropol NJ, Saphner TJ, Jahanzeb M, Perez EA, Lin NU, Sledge GW, et al. A randomized phase III double-blinded placebo-controlled trial of first-line chemotherapy and trastuzumab with or without bevacizumab for patients with HER2/neu-overexpressing metastatic breast cancer (HER2+ MBC): A trial of the Eastern Cooperative Oncology Group (E1105) [abstract]. *J Clin Oncol*. 2012; 30: 605.
50. Slamon DJ, Swain SM, Buyse M, Martin M, Geyer C, Im Y-H, Pienkowski T, Kim S-B, Robert N, Steger G, Crown J, Verma S, Eierman W et al. Primary results from BETH, a phase 3 controlled study of adjuvant chemotherapy and trastuzumab ± bevacizumab in patients with HER2-positive, node-positive or high risk node-negative breast cancer [abstract]. *San Antonio Breast Cancer Symposium*. 2013; S1-03.
51. Willett CG, Boucher Y, di Tomaso E, Duda DG, Munn LL, Tong RT, Chung DC, Sahani DV, Kalva SP, Kozin SV, Mino M, Cohen KS, Scadden DT, et al. Direct evidence that the VEGF-specific antibody bevacizumab has antivascular effects in human rectal cancer. *Nature Med*. 2004; 10: 145-147.
52. Willett CG, Boucher Y, Duda DG, di Tomaso E, Munn LL, Tong RT, Kozin SV, Petit L, Jain RK, Chung DC, Sahani DV, Kalva SP, Cohen KS, et al. Surrogate markers for antiangiogenic therapy and dose-limiting toxicities for bevacizumab with radiation and chemotherapy: continued experience of a phase I trial in rectal cancer patients. *J Clin Oncol*. 2005; 23: 8136-8139.
53. Willett CG, Duda DG, di Tomaso E, Boucher Y, Ancukiewicz M, Sahani DV, Lahdenranta J, Chung DC, Fischman AJ, Lauwerd GY, Shellito P, Czito BG, Wong TZ, et al. Efficacy, safety, and biomarkers of neoadjuvant bevacizumab, radiation therapy, and fluorouracil in rectal cancer: a multidisciplinary phase II study. *J Clin Oncol*. 2009; 27: 3020-3026.
54. Nagengast WB, de Vries EG, Hospers GA, Mulder NH, de Jong JR, Hollema H, van Dongen GA, Perk LR, Lub-de Hooge MN. In vivo VEGF imaging with radiolabeled bevacizumab in a human ovarian tumor xenograft. *J Nucl Med*. 2007; 48: 1313-1319.
55. Dijkers EC, Oude Munnink TH, Kosterink JG, Brouwers AH, Jager PL, de Jong JR, van Dongen GA, Schröder CP, Lub-de Hooge MN, de Vried EG. Biodistribution of 89Zr-trastuzumab and PET imaging of HER2-positive lesions in patients with metastatic breast cancer. *Clin Pharmacol Ther*. 2010; 87: 586-592.
56. Dijkers ECF, Kosterink JG, Rademaker AP, Perk LR, van Dongen GA, Bart J, de Jong JR, de Vries EG, Lub-de Hooge MN. Development and characterization of clinical-grade 89Zr-trastuzumab for HER2/neu immunoPET imaging. *J Nucl Med*. 2009; 50: 974-981.
57. Gaykema SBM, Brouwers AH, Lub-de Hooge MN, Pleijhuis RG, Timmer-Bosscha H, Pot L, van DAM GM, van der Meulen SB, de Jong JR, Bart J, de Vries J, Jansen L, de Vries EG, et al. 89Zr-bevacizumab PET imaging in primary breast cancer. *J Nucl Med*. 2013; 54: 1014-1018.
58. Van Asselt SJ, Oosting SF, Brouwers AH, Bongaerts AH, de Jong JR, Lub-de Hooge MN, Oude Munnink TH, Flebrich HB, Sluiter WJ, Links TP, Walenkamp M, de Vries EG. Everolimus reduces 89Zr-bevacizumab tumor uptake in patients with neuroendocrine tumors. *J Nucl Med*. 2014; 55: 1087-1092.
59. Nagengast WB, Lub-de Hooge MN, Oosting SF, den Dunnen WF, Warnders FJ, Brouwers AH, de Jong JR, Price PM, Hollema H, Hospers GA, Elsinga PH, Hesselink JW, Gietema JA, et al. VEGF-PET imaging is a noninvasive biomarker showing differential changes in the tumor during

- sunitinib treatment. *Cancer res.* 2011; 71: 143-153.
60. Arjaans M, Oude Munnink TH, Oosting SF, Terwisscha van Scheltinga AG, Gietema JA, Garbacik ET, Timmer-Bosscha H, Lub-de Hooge MN, Schröder CP, de Vries EG. Bevacizumab-induced normalization of blood vessels in tumors hampers antibody uptake. *Cancer Res.* 2013; 73: 3347–3355.
  61. Pastuskovas CV, Mundo EE, Williams SP, Nayak TK, Ho J, Ulufatu S, Clark S, Ross S, Cheng E, Parsons-Reponte K, Cain G, Van Hoy M, Majidy N, et al. Effects of anti-VEGF on pharmacokinetics, biodistribution, and tumor penetration of trastuzumab in a preclinical breast cancer model. *Mol Cancer Ther.* 2012; 11: 752–762.
  62. Heskamp S, Boerman OC, Molkenboer-Kuening DM, Oyen WJ, van der Graaf WT, van Laarhoven HW. Bevacizumab reduces tumor targeting of anti-epidermal growth factor and anti-insulin-like growth factor 1 receptor antibodies. *Int J Cancer.* 2013; 133: 307–314.
  63. Oosting SF, Brouwers AH, Van Es SC, Nagengast WB, Oude Munnink TH, Lub-de Hooge MN, Hollema H, de Jong JR, de Jong IJ, de Haas S, Scherer SJ, Sluiter WJ, Dierckx RA, et al. <sup>89</sup>Zr-bevacizumab PET visualizes heterogeneous tracer accumulation in tumor lesions of renal cell carcinoma patients and differential effects of antiangiogenic treatment. *J Nucl Med.* 2015; 56: 63-69.
  64. van der Veldt, AA, Lubberink M, Bahce I, Walraven M, de Boer MP, Greuter HN, Hendrikse NH, Eriksson J, Windhorst AD, Postmus PE, Verheul HM, Serné EH, Lammertsma AA, et al. Rapid decrease in delivery of chemotherapy to tumors after anti-VEGF therapy: implications for scheduling of anti-angiogenic drugs. *Cancer Cell.* 2012; 21: 82–91.
  65. Zissen MH, Kunz P, Subbarayan M, Chin FT, Conti PS, Fisher GA, Quon A. <sup>18</sup>F-5-fluorouracil dynamic positron emission tomography/computed tomography shows decreased tracer activity after bevacizumab in colorectal liver metastases. *Nucl Med Commun.* 2011; 32: 343–347.
  66. Tebbutt NC, Wilson K, Gebiski VJ, Cummins MM, Zannino D, van Hazel GA, Robinson B, Broad A, Ganju V, Ackland SP, Forgeson G, Cunningham D, Saunders MP, et al. Capecitabine, bevacizumab, and mitomycin in first-line treatment of metastatic colorectal cancer: results of the Australasian Gastrointestinal Trials Group Randomized Phase III MAX Study. *J Clin Oncol.* 2010; 28: 3191-3198.
  67. Aghajanian C, Blank S, Goff B, Judson PL, Teneriello MG, Husain A, Sovak MA, Yi J, Nycum LR. OCEANS: a randomized, double-blind, placebo-controlled phase III trial of chemotherapy with or without bevacizumab in patients with platinum-sensitive recurrent epithelial ovarian, primary peritoneal, or Fallopian tube cancer. *J Clin Oncol.* 2013; 30: 2039-2045.
  68. Tewari KS, Sill MW, Long HJ 3rd, Penson RT, Huang H, Ramondetta LM, Landrum LM, Oaknin A, Reid TJ, Leitao MM, Michael HE, Monk BJ. Improved survival with bevacizumab in advanced cervical cancer. *N Engl J Med.* 2014; 370: 734-743.
  69. Von Minckwitz G, Puglisi F, Cortes K, Vrdoljak E, Marschner N, Zielinski C, Villanueva C, Romieu G, Lang I, Ciruelos E, De Laurentiis M, Veyret C, de Ducla S, et al. Bevacizumab plus chemotherapy versus chemotherapy alone as second-line treatment for patients with HER2-negative locally recurrent or metastatic breast cancer after first-line treatment with bevacizumab plus chemotherapy (TANIA): an open-label, randomised phase 3 trial. *Lancet Oncol.* 2014; 15: 1269-1278.
  70. Gligorov J, Doval D, Bines J, Alba E, Cortes P, Pierga JY, Gupta V, Costa R, Srock S, de Ducla S, Freudenstung U, Mustacchi G. Maintenance capecitabine and bevacizumab versus bevacizumab alone after initial first-line bevacizumab and docetaxel for patients with HER2-negative metastatic breast cancer (IMELDA): a randomised, open-label, phase 3 trial. *Lancet Oncol.* 2014; 15: 1351-1360.
  71. Heist RS, Duda DG, Sahani DV, Ancukiewicz M, Fidias P, Sequist LV, Temel JS, Shaw AT, Pennell NA, Neal JW, Gandhi L, Lynch TJ, Engelman JA, et al. Improved tumor vascularization after anti-VEGF therapy with carboplatin and nab-paclitaxel associates with survival in lung cancer. *Proc Natl Acad Sci USA.* 2015; 112: 1547-1552.
  72. Chauhan VP, Stylianopoulos T, Martin JD, Popović Z, Chen O, Kamoun WS, Bawendi MG, Fukumura D, Jain RK. Normalization of tumor blood vessels improves the delivery of nanomedicines in a size-dependent manner. *Nat Nanotechnol.* 2012; 7: 383–388.
  73. Popović Z, Liu W, Chauhan VP, Lee J, Wong C, Gretyak AB, Insin N, Nocera DG, Fukumura D, Jain RK, Bawendi MG. A nanoparticle size series for in vivo fluorescence imaging. *Angew Chem Int Ed Engl.* 2010; 49: 8649-8652.
  74. Huang Y, Stylianopoulos T, Duda DG, Fukumura D, Jain RK. Benefits of vascular normalization are dose and time dependent. *Cancer Res.* 2013; 73: 7144-7146.
  75. Boswell CA, Tesar DB, Mukhyala K, Thell FP, Fielder PJ, Khawli LA. Effects of charge on antibody tissue distribution and pharmacokinetics. *Bioconjugate Chem.* 2010; 21: 2153-2163.
  76. Dellian M, Yuan F, Trubetskoy VS, Torchilin VP, Jain RK. Vascular permeability in a human tumour xenograft: molecular charge dependence. *Br J Cancer* 2000; 82: 1513-1518.
  77. Fuchs CS, Tomasek J, Yong CJ, Dumitru F, Passalacqua R, Goswami C, Safran H, dos Santos LV, Aprile G, Ferry DR, Melichar B, Tehfe M, Topuzov E, et al. Ramucirumab monotherapy for previously treated advanced gastric or gastro-oesophageal junction adenocarcinoma (REGARD): an international, randomised, multicentre, placebo-controlled, phase 3 trial. *Lancet.* 2014; 383: 31-39.
  78. Wilke H, Muro K, Van Cutsem E, Oh SC, Bodoky G, Shimada Y, Hironaka S, Sugimoto N, Lipatov O, Kim TY, Cunningham D, Rougier P, Fomatsu Y, et al. Ramucirumab plus paclitaxel versus placebo plus paclitaxel in patients

- previously treated advanced gastric or gastro-oesophageal junction adenocarcinoma (RAINBOW): a double-blind, randomised phase 3 trials. *Lancet Oncol.* 2014; 15: 1224-1235.
79. Garon EB, Ciuleanu TE, Arrieta O, Prabhaskar K, Syrigos KN, Goksel T, Park K, Gorbunova V, Kowalyszyn RD, Pikiel J, Czyzewicz G, Orlov SV, Lewanski CR, et al. Ramucirumab plus docetaxel versus placebo plus docetaxel for second-line treatment of stage IV non-small-cell lung cancer after disease progression on platinum-based therapy (REVEL): a multicentre, double-blind, randomised phase 3 trial. *Lancet.* 2014; 384: 665-673.
  80. Tabernero J, Yoshino T, Cohn AL, Obermannova R, Bodoky G, Garcia-Carbonero R, Ciuleanu TE, Portnoy DC, Van Cutsem E, Grothey A, Prausová J, Garcia-Alfonso P, Yamazaki K, et al. Ramucirumab versus placebo in combination with second-line FOLFIRI in patients with metastatic colorectal carcinoma that progressed during or after first-line therapy with bevacizumab, oxaliplatin, and a fluoropyrimidine (RAISE): a randomized, double-blind, multicenter, phase 3 study. *Lancet Oncol.* 2015; 16: 499-508.
  81. Mackey JR, Ramos-Vasquez M, Lipatov O, McCarthy N, Krasnozhan D, Semiglazov V, Manikhas A, Gelmon KA, Konecny GE, Webster M, Hegg R, Verma S, Gorbunova V, et al. Primary results of ROSE/TRIO-12, a randomized, placebo-controlled phase III trial evaluating the addition of ramucirumab to first-line docetaxel chemotherapy in metastatic breast cancer. *J Clin Oncol.* 2015; 33: 141-148.
  82. Shaked Y, Henke E, Roodhart J, Mancuso P, Langenberg M, Colleoni M, Daenen LG, Man S, Xu P, Emmenegger U, Tang T, Zhu Z, Witte L et al. Rapid chemotherapy-induced acute endothelial progenitor cell mobilization: implications for antiangiogenic drugs as chemosensitizing agents. *Cancer Cell.* 2008; 14: 263-273.
  83. Blagosklonny MV. How Avastin potentiates chemotherapeutic drugs: action and reaction in antiangiogenic therapy. *Cancer Biol Ther.* 2005; 4: 1307-1310.
  84. Kerbel RS. Antiangiogenic therapy: A universal chemosensitization strategy for cancer? *Science.* 2006; 312: 1171-1175.
  85. Kim JJ, Tannock IF. Repopulation of cancer cells during therapy: an important cause of treatment failure. *Nat Rev Cancer.* 2005; 5: 516-525.
  86. Ortholan C, Durivault J, Hannoun-Levi J-M, Guyot M, Bourcier C, Ambrosetti D, Safe S, Pagès G. Bevacizumab/docetaxel association is more efficient than docetaxel alone in reducing breast and prostate cancer cell growth: A new paradigm for understanding the therapeutic effect of combined treatment. *Eur J Cancer.* 2010; 46: 3022-3036.
  87. Wong PP, Demircioglu F, Ghazaly E, Alrawashdeh W, Stratford MR, Scudamore CL, Cereser B, Crnogorac-Jurcevic T, McDonald S, Elia G, Hagermann T, Kocher HM, Hodivala-Dilke KM. Dual-action combination therapy enhances angiogenesis while reducing tumor growth and spread. *Cancer Cell.* 2015; 27: 123-137.
  88. Rosenberg RD, Aird WC. Vascular-bed-specific hemostasis and hypercoagulable states. *N Engl J Med.* 1999; 340: 1555-1564.
  89. Nagy JA, Chang SH, Shih SC, Dvorak AM, Dvorak HF. Heterogeneity of the tumor vasculature. *Semin Thromb Hemost.* 2010; 36: 321-331.
  90. Sitohy B, Nagy JA, Dvorak HF. Anti-VEGF/VEGFR therapy for cancer: reassessing the target. *Cancer Res.* 2012; 72:1909-1914.
  91. Jubb AM, Cesario A, Ferguson M, Congedo MT, Gatter KC, Lococo F, Mulè A, Pezzella F. Vascular phenotypes in primary non-small cell lung carcinomas and matched brain metastases. *Br J Cancer.* 2011; 104: 1877-1881.
